# Supplementary material for: Solar thermal-activated photocatalysis for hydrogen production and aqueous triethanolamine polymerization
Source: Royal Society of Chemistry journal article supplement (doi:10.1039/d2ta02066a), 2022-01-01
Supplement: d2ta02066a1.pdf [file d2ta02066a1.pdf]

## Supporting information for

# Solar Thermal Activated Photocatalysis for Hydrogen Production and Aqueous Triethanolamine Polymerization

Jinghui Wang<sup>a, †</sup>, Ziping Wang<sup>a, d, †</sup>, Xia Wang<sup>a</sup>, Peihe Li<sup>a, \*</sup>, Danhui Sun<sup>a</sup>, Limei Duan<sup>a</sup>, Jie Bai<sup>c</sup>, Sarina Sarina<sup>b</sup>, Huaiyong Zhu<sup>b</sup>, Jinghai Liu<sup>a, \*</sup>

*<sup>a</sup>Inner Mongolia Key Laboratory of Carbon Nanomaterials, Inner Mongolia Engineering Research Center of Lithium-Sulfur Battery Energy Storage, Nano Innovation Institute (NII), College of Chemistry and Materials Science, Inner Mongolia Minzu University, Tongliao 028000, People's Republic of China. Email: jhliu2008@sinano.ac.cn; phli2018@foxmail.com; Fax: 86-475-8313570; Tel: 86-475-8314342*

*<sup>b</sup>School of Chemistry, Physics and Mechanical Engineering, Queensland University of Technology, Brisbane, QLD, 4001, Australia*

*<sup>c</sup>Chemical Engineering College, Inner Mongolia University of Technology, Huhhot 010051, People's Republic of China*

*<sup>d</sup>National & Local United Engineering Laboratory for Power Battery, Department of Chemistry, Northeast Normal University, Changchun 130024, People's Republic of China*

*† J.H.W. and Z.P.W. contribute equally to the work*

**Figure and Table list:**

**Fig. S1** XRD patterns of the g-C<sub>3</sub>N<sub>4</sub> samples.

**Fig. S2** UV-Vis DRS of the g-C<sub>3</sub>N<sub>4</sub> samples.

**Fig. S3** The band-gap structure of the g-C<sub>3</sub>N<sub>4</sub> samples.

**Fig. S4** Mott-Schottky plots for (a) g-C<sub>3</sub>N<sub>4</sub>-CQ, (b) g-C<sub>3</sub>N<sub>4</sub>-CQ/Pt, (c) g-C<sub>3</sub>N<sub>4</sub>-HG, (d) g-C<sub>3</sub>N<sub>4</sub>-OM, (e) g-C<sub>3</sub>N<sub>4</sub>-H1, (f) g-C<sub>3</sub>N<sub>4</sub>-T.

**Fig. S5** The absorption of the g-C<sub>3</sub>N<sub>4</sub>-CQ with the rate of hydrogen evolution under the monochromatic light irradiation.

**Fig. S6** FTIR of the g-C<sub>3</sub>N<sub>4</sub> samples.

**Fig. S7** (a-b) Nitrogen adsorption/desorption isotherms. (c) Pore size distribution analysis. (d) Specific surface area and BET plots.

**Fig. S8** TEM and corresponding HAAD-STEM images for g-C<sub>3</sub>N<sub>4</sub>-H1 (a) and (c), g-C<sub>3</sub>N<sub>4</sub>-H1/Pt (b) and (d), g-C<sub>3</sub>N<sub>4</sub>-HG (e) and (g), g-C<sub>3</sub>N<sub>4</sub>-HG/Pt (f) and (h).

**Fig. S9** TEM and corresponding HAAD-STEM images for g-C<sub>3</sub>N<sub>4</sub>-OM (a) and (c), g-C<sub>3</sub>N<sub>4</sub>-OM/Pt (b) and (d), g-C<sub>3</sub>N<sub>4</sub>-T (e) and (g), g-C<sub>3</sub>N<sub>4</sub>-T/Pt (f) and (h).

**Fig. S10** XPS spectra of the g-C<sub>3</sub>N<sub>4</sub>-CQ.

**Fig. S11** XPS spectra of the g-C<sub>3</sub>N<sub>4</sub>-CQ/Pt.

**Fig. S12** XPS spectra of the g-C<sub>3</sub>N<sub>4</sub>-HG.

**Fig. S13** XPS spectra of the g-C<sub>3</sub>N<sub>4</sub>-HG/Pt.

**Fig. S14** XPS spectra of the g-C<sub>3</sub>N<sub>4</sub>-OM.

**Fig. S15** XPS spectra of the g-C<sub>3</sub>N<sub>4</sub>-OM/Pt.

**Fig. S16** XPS spectra of the g-C<sub>3</sub>N<sub>4</sub>-H1.

**Fig. S17** XPS spectra of the g-C<sub>3</sub>N<sub>4</sub>-H1/Pt.

**Fig. S18** XPS spectra of the g-C<sub>3</sub>N<sub>4</sub>-T.

**Fig. S19** XPS spectra of the g-C<sub>3</sub>N<sub>4</sub>-T/Pt.

**Fig. S20.** Successive test runs for the HER on g-C<sub>3</sub>N<sub>4</sub>-CQ/Pt under visible light irradiation.

**Fig. S21.** Successive test runs for the HER on g-C<sub>3</sub>N<sub>4</sub>-HG/Pt under visible light irradiation.

**Fig. S22.** Successive test runs for the HER on g-C<sub>3</sub>N<sub>4</sub>-OM/Pt under visible light

irradiation.

**Fig. S23** NBO charges analysis for the calculated Pt<sub>6</sub>-CN, H-Pt<sub>6</sub>-CN and H<sub>2</sub>-Pt<sub>6</sub>-CN.

**Fig. S24** (a) Schematic chemical structure of g-C<sub>3</sub>N<sub>4</sub>. (b) Surface electrostatic potential distribution of g-C<sub>3</sub>N<sub>4</sub>. (c) Surface electrostatic potential distribution of Pt cluster-carbon nitride (Pt<sub>6</sub>-CN).

**Fig. S25** The nuclear magnetic resonance (NMR) spectrum for TEOA polymerization product.

**Fig. S26** Scheme for free radical polymerization of TEOA initiated by STAP hole-mediated radical reactions.

**Fig. S27** The mass spectrum (part) of TEOA polymerization product.

**Fig. S28** Infrared camera images of solution temperature change under irradiation.

**Fig. S29** The particle size of (a) g-C<sub>3</sub>N<sub>4</sub>-CQ/Pt, (b) g-C<sub>3</sub>N<sub>4</sub>-HI/Pt, (c) g-C<sub>3</sub>N<sub>4</sub>-HG/Pt, (d) g-C<sub>3</sub>N<sub>4</sub>-OM/Pt, (e) g-C<sub>3</sub>N<sub>4</sub>-T/Pt.

**Table S1.** Atomic percentage and atomic ratio for TEOA polymerization production

**Table S2.** XPS atomic percentage analysis of Pt deposited g-C<sub>3</sub>N<sub>4</sub> samples

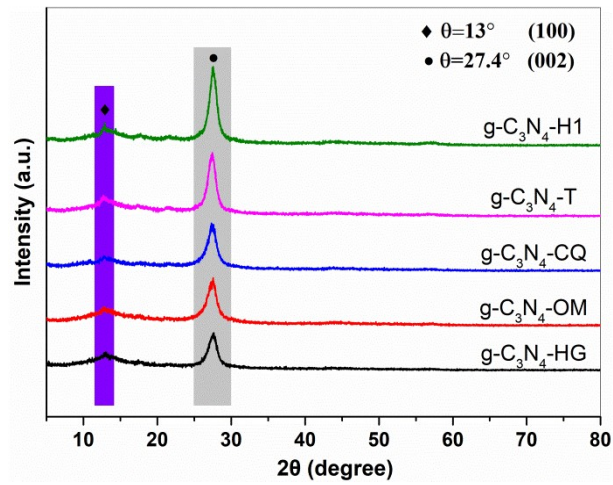

Fig. S1 XRD patterns of the g-C<sub>3</sub>N<sub>4</sub> samples.

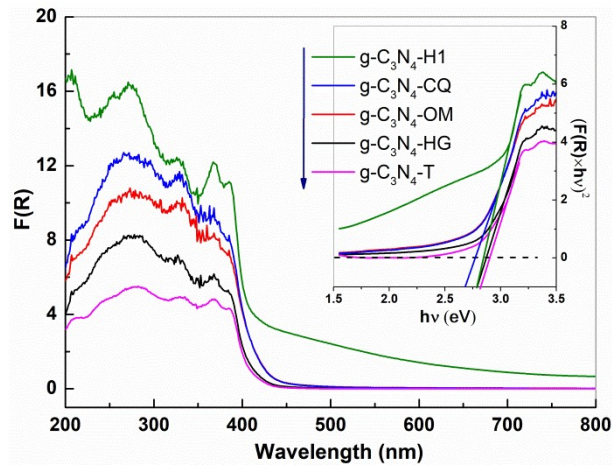

Fig. S2 UV-Vis DRS of the g-C<sub>3</sub>N<sub>4</sub> samples. Insets, the Tauc plots.

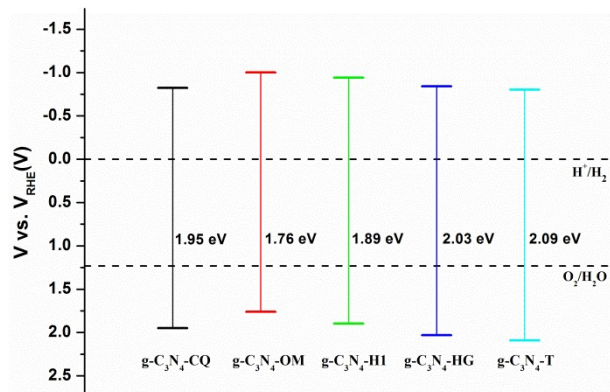

Fig. S3 The band-gap structure of the g-C<sub>3</sub>N<sub>4</sub> samples.

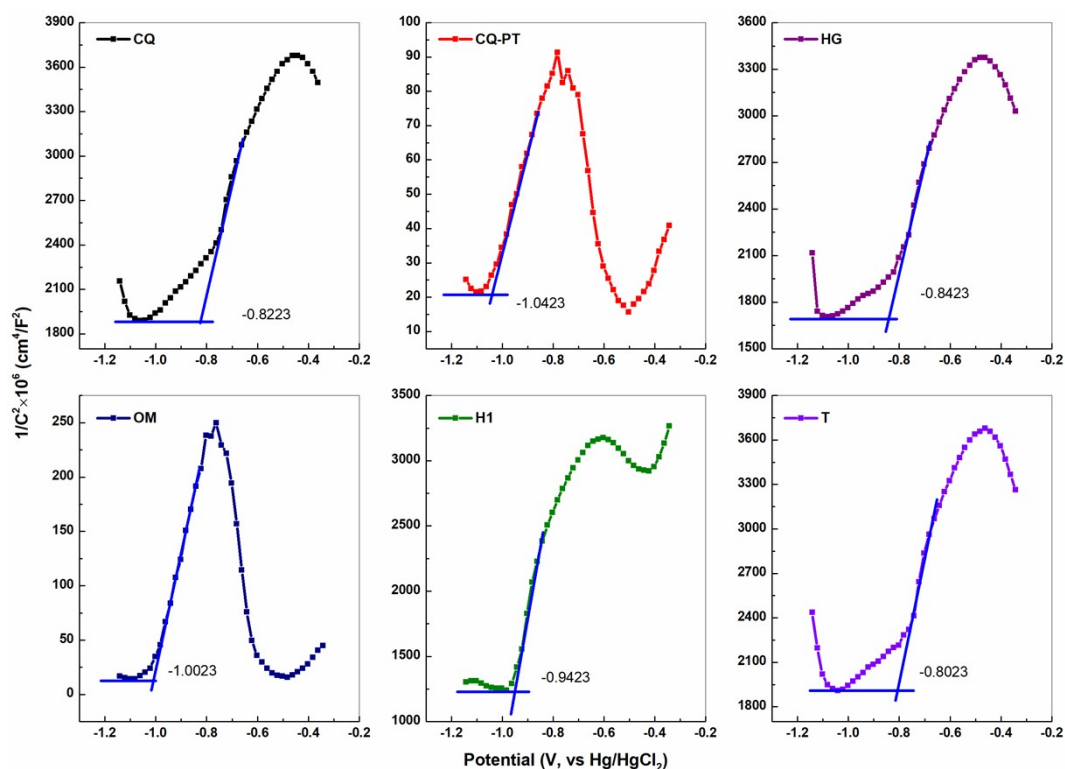

**Fig. S4** Mott-Schottky plots for (a)  $g\text{-C}_3\text{N}_4\text{-CQ}$ , (b)  $g\text{-C}_3\text{N}_4\text{-CQ/Pt}$ , (c)  $g\text{-C}_3\text{N}_4\text{-HG}$ , (d)  $g\text{-C}_3\text{N}_4\text{-OM}$ , (e)  $g\text{-C}_3\text{N}_4\text{-H1}$ , (f)  $g\text{-C}_3\text{N}_4\text{-T}$ .

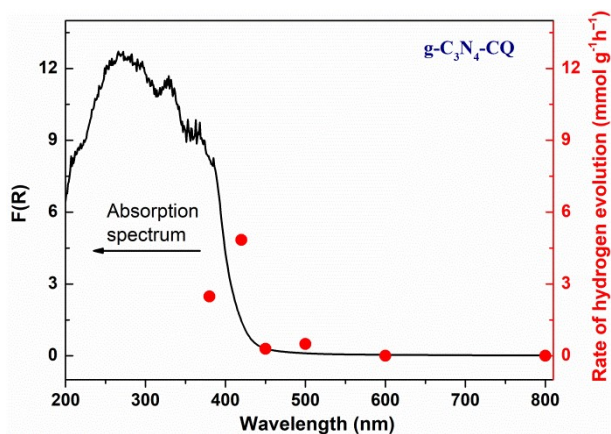

**Fig. S5** The absorption of the  $g\text{-C}_3\text{N}_4\text{-CQ}$  with the rate of hydrogen evolution under the monochromatic light irradiation.

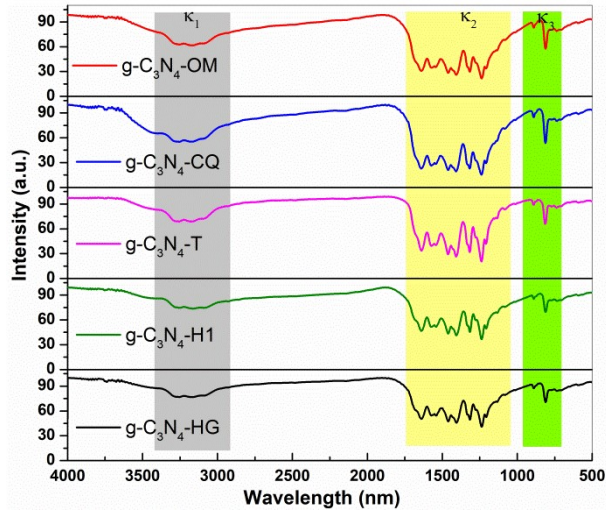

**Fig. S6** FTIR of the  $g\text{-C}_3\text{N}_4$  samples.

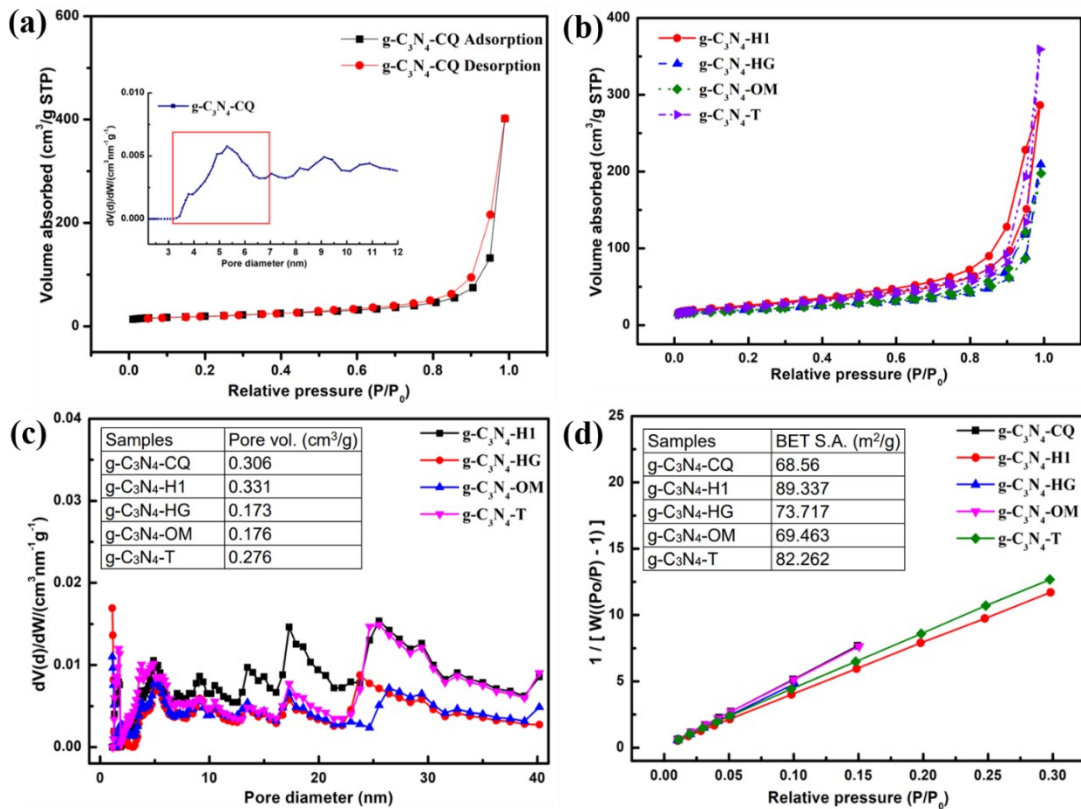

**Fig. S7** (a-b) Nitrogen adsorption/desorption isotherms. (c) Pore size distribution analysis. (d) Specific surface area and BET plots.

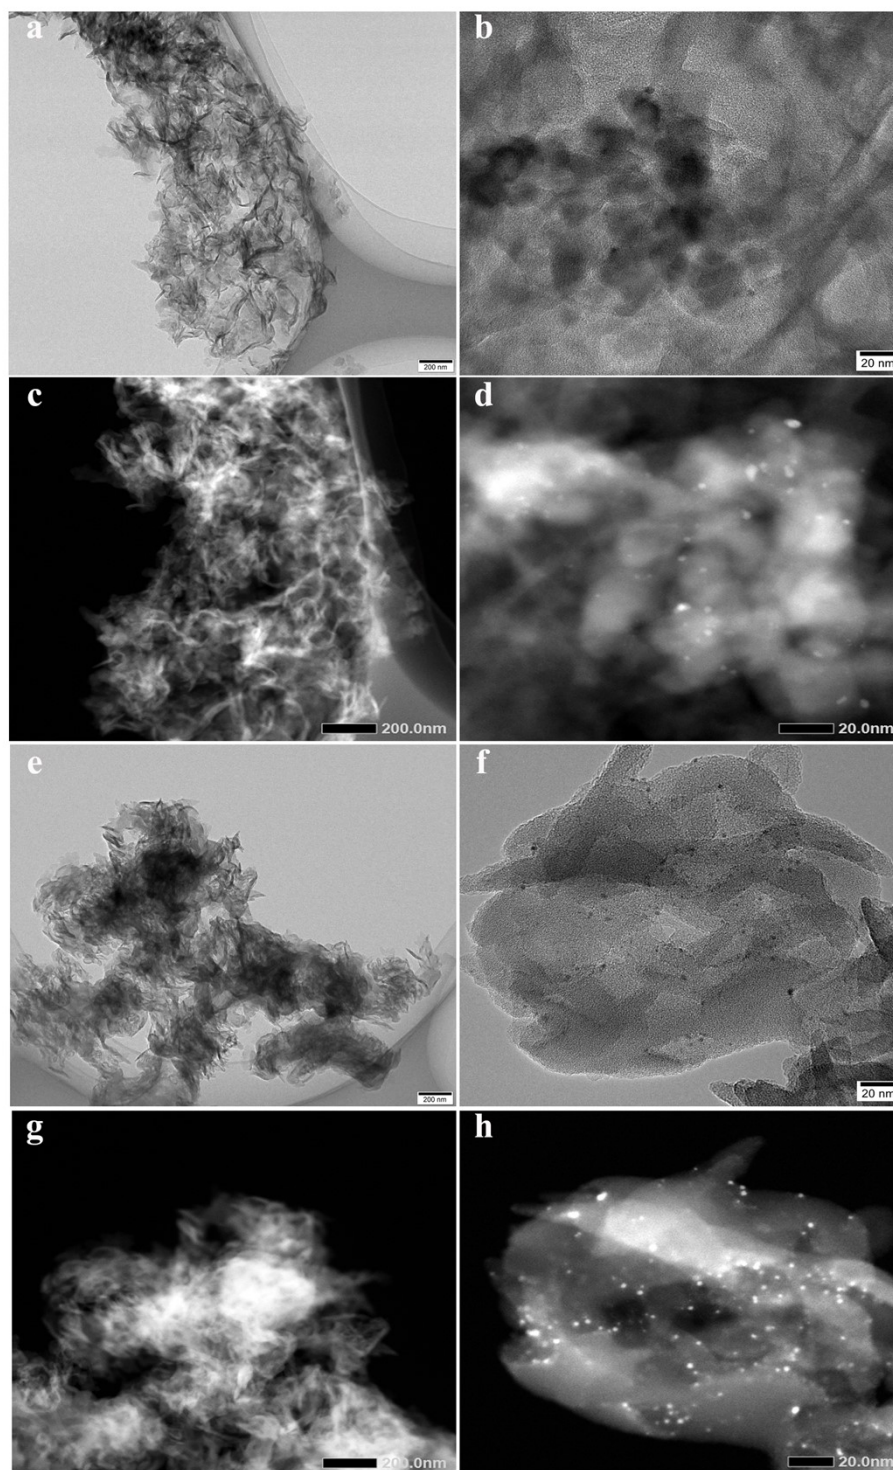

**Fig. S8** TEM and corresponding HAAD-STEM images for g-C<sub>3</sub>N<sub>4</sub>-H1 (a) and (c), g-C<sub>3</sub>N<sub>4</sub>-H1/Pt (b) and (d), g-C<sub>3</sub>N<sub>4</sub>-HG (e) and (g), g-C<sub>3</sub>N<sub>4</sub>-HG/Pt (f) and (h).

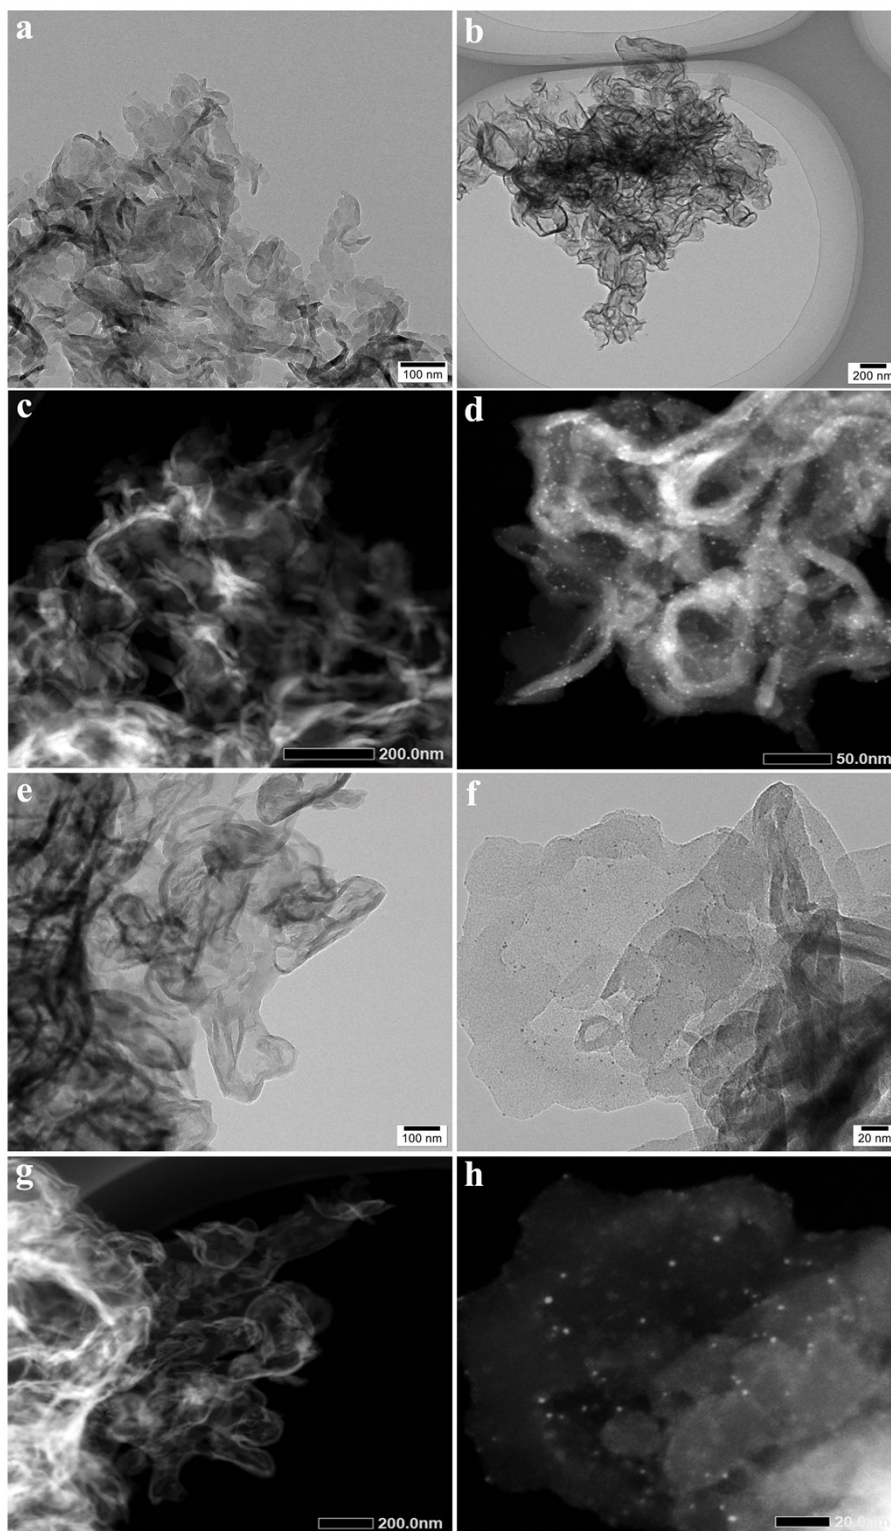

**Fig. S9** TEM and corresponding HAAD-STEM images for g-C<sub>3</sub>N<sub>4</sub>-OM (a) and (c), g-C<sub>3</sub>N<sub>4</sub>-OM/Pt (b) and (d), g-C<sub>3</sub>N<sub>4</sub>-T (e) and (g), g-C<sub>3</sub>N<sub>4</sub>-T/Pt (f) and (h).



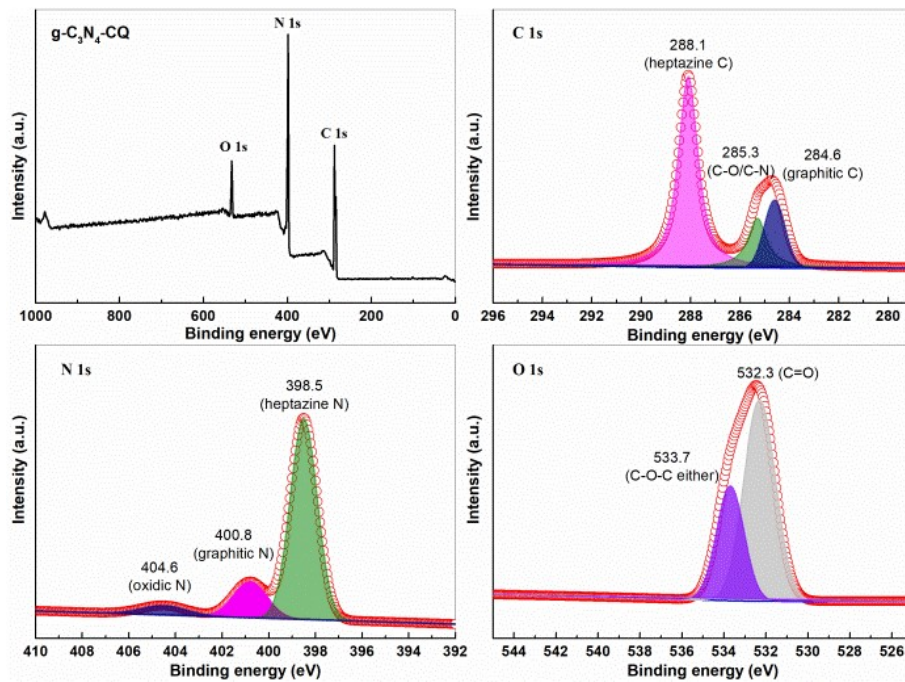

**Fig. S10** XPS spectra of the  $g\text{-C}_3\text{N}_4\text{-CQ}$ . (a) XPS survey. High-resolution C 1s (b), N 1s (c) and O 1s (d).

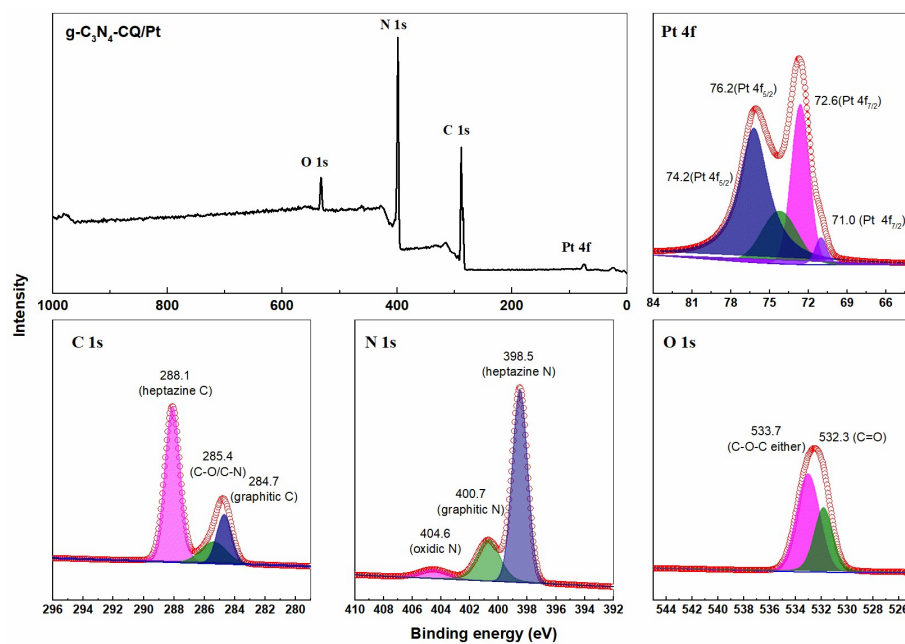

**Fig. S11** XPS spectra of the  $g\text{-C}_3\text{N}_4\text{-CQ/Pt}$ . (a) XPS survey. High-resolution Pt 4f (b), C 1s (c), N 1s (d) and O 1s (e).

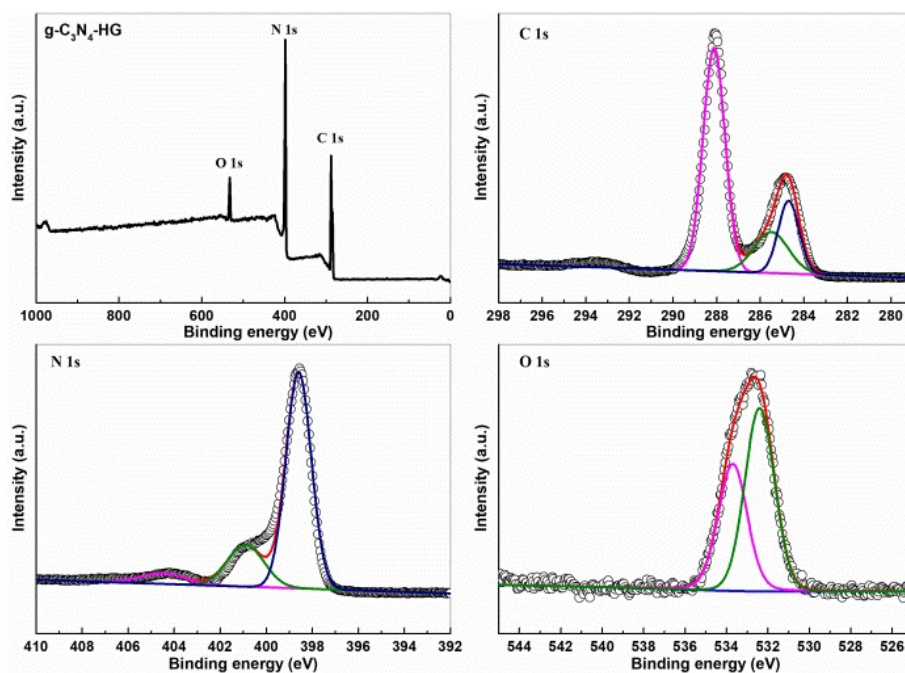

**Fig. S12** XPS spectra of the g-C<sub>3</sub>N<sub>4</sub>-HG. (a) XPS survey. High-resolution C 1s (b), N 1s (c) and O 1s (d).

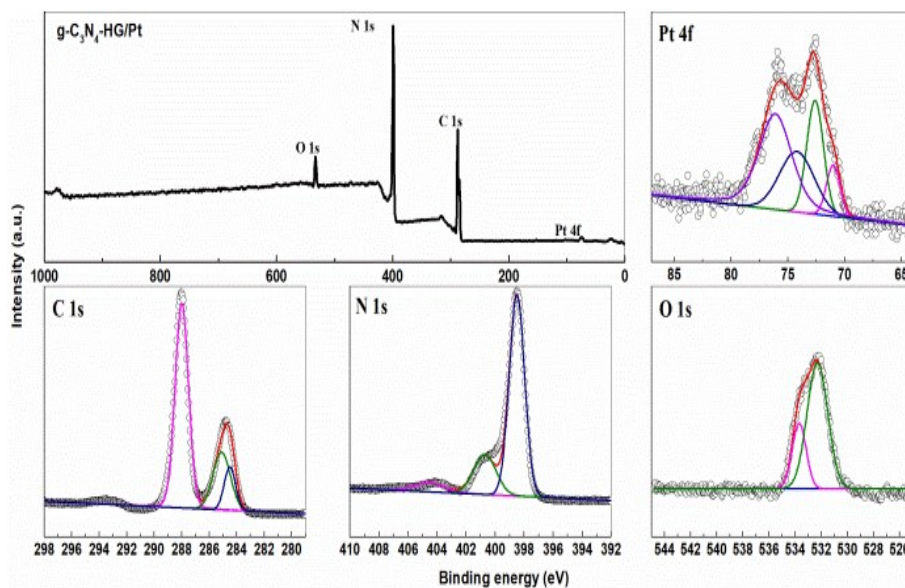

**Fig. S13** XPS spectra of the g-C<sub>3</sub>N<sub>4</sub>-HG/Pt. (a) XPS survey. High-resolution Pt 4f (b), C 1s (c), N 1s (d) and O 1s (e).

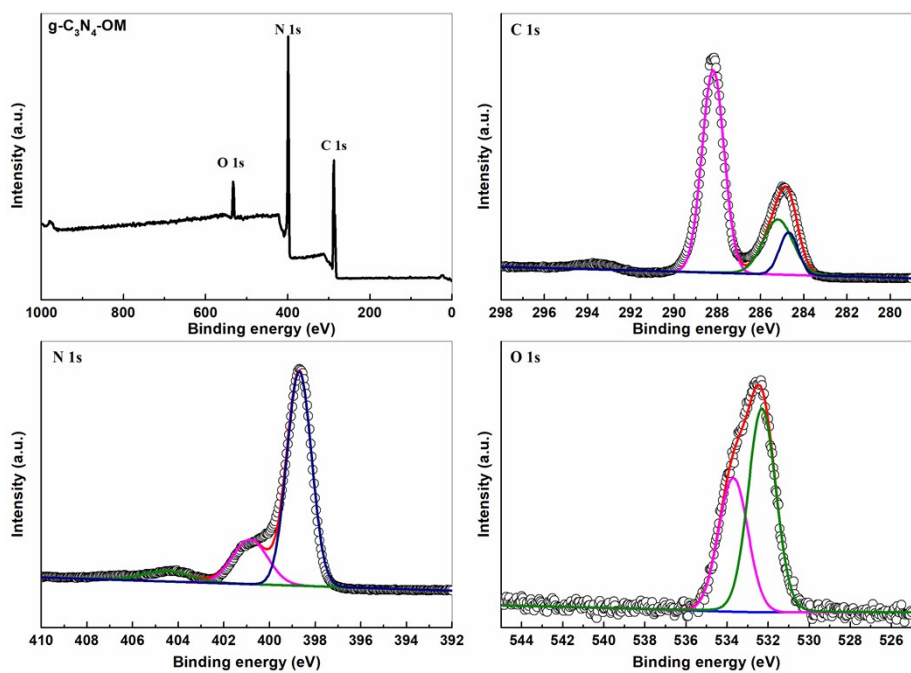

**Fig. S14** XPS spectra of the g-C<sub>3</sub>N<sub>4</sub>-OM. (a) XPS survey. High-resolution C 1s (b), N 1s (c) and O 1s (d).

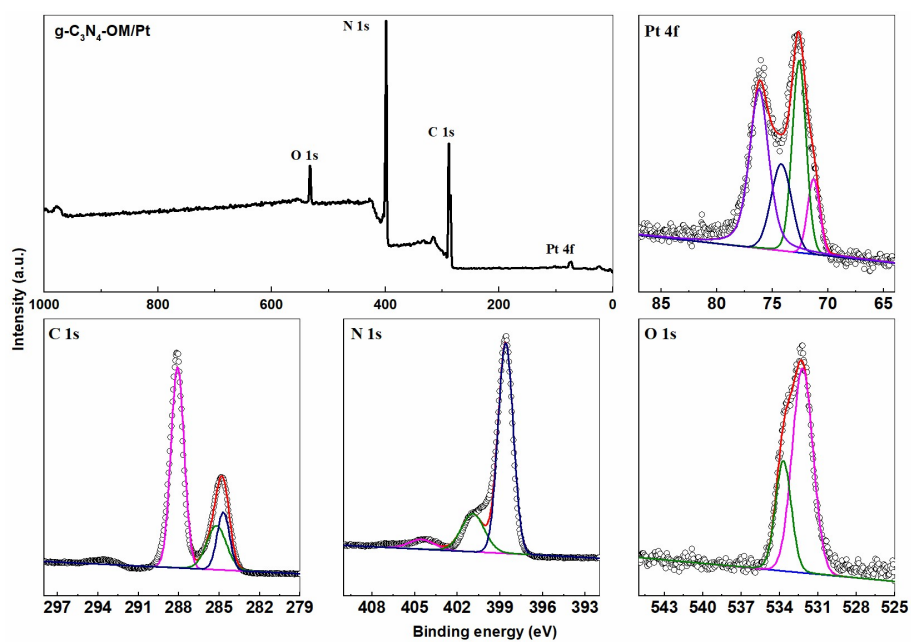

**Fig. S15** XPS spectra of the g-C<sub>3</sub>N<sub>4</sub>-OM/Pt. (a) XPS survey. High-resolution Pt 4f (b), C 1s (c), N 1s (d) and O 1s (e).

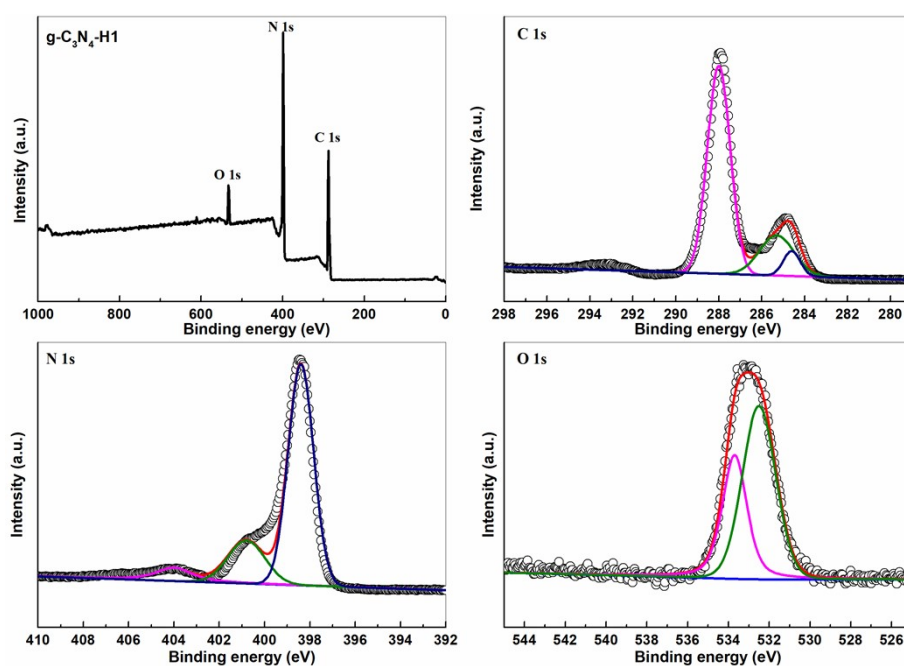

**Fig. S16** XPS spectra of the g-C<sub>3</sub>N<sub>4</sub>-H1. (a) XPS survey. High-resolution C 1s (b), N 1s (c) and O 1s (d).

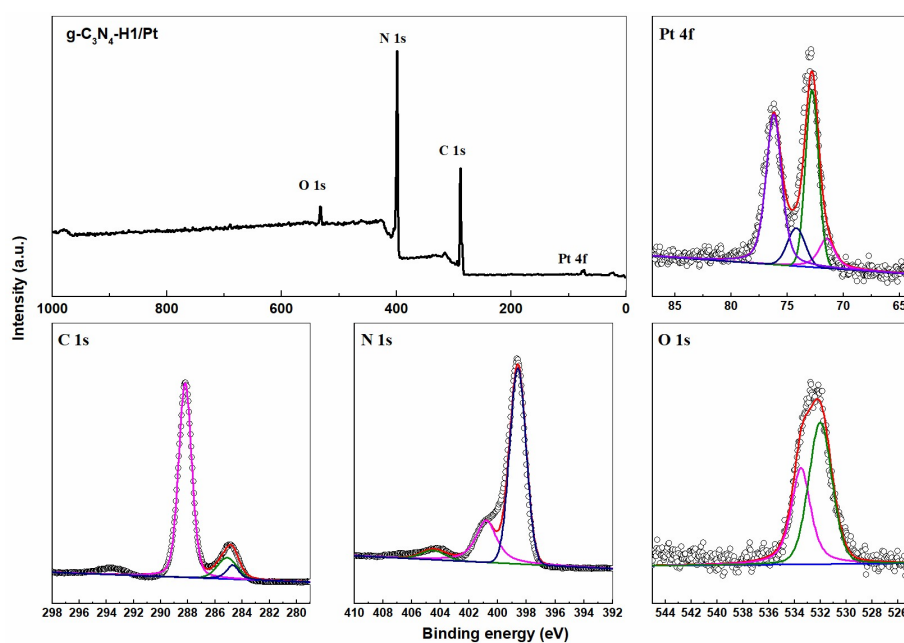

**Fig. S17** XPS spectra of the g-C<sub>3</sub>N<sub>4</sub>-H1/Pt. (a) XPS survey. High-resolution Pt 4f (b), C 1s (c), N 1s (d) and O 1s (e).

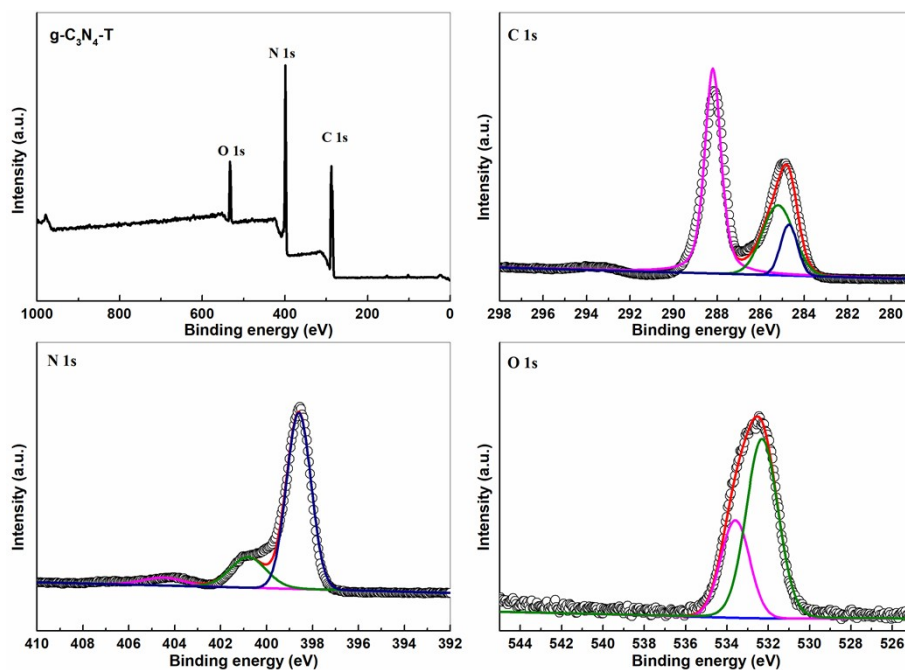

**Fig. S18** XPS spectra of the g-C<sub>3</sub>N<sub>4</sub>-T. (a) XPS survey. High-resolution C 1s (b), N 1s (c) and O 1s (d).

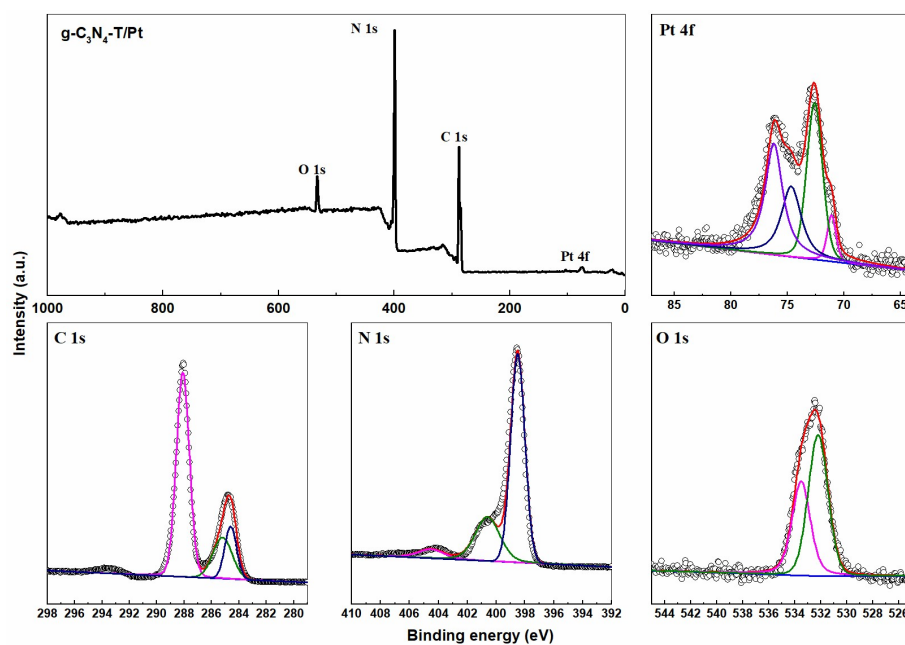

**Fig. S19** XPS spectra of the g-C<sub>3</sub>N<sub>4</sub>-T/Pt. (a) XPS survey. High-resolution Pt 4f (b), C 1s (c), N 1s (d) and O 1s (e).

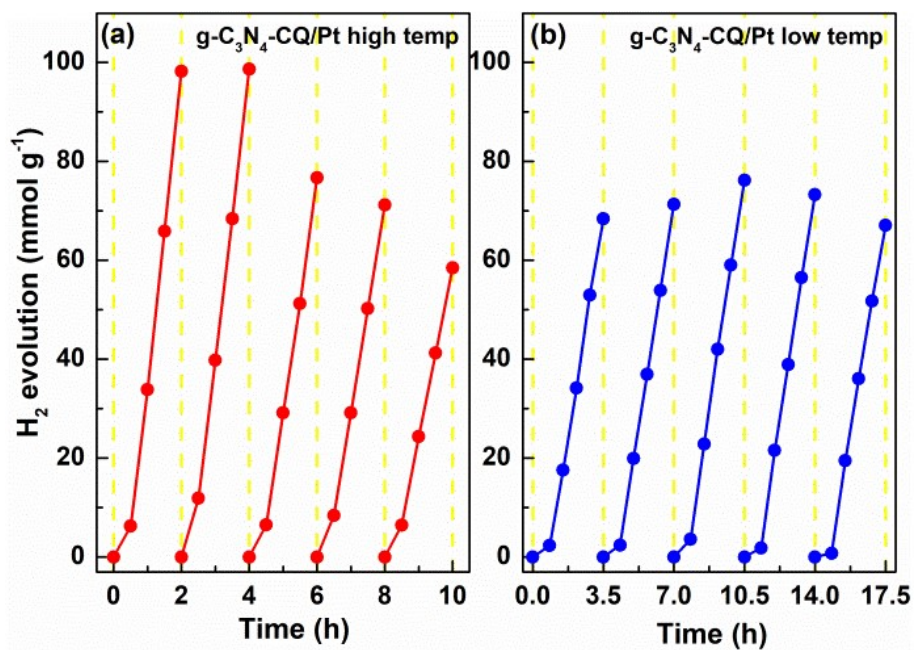

**Fig. S20** Successive test runs for the HER on g-C<sub>3</sub>N<sub>4</sub>-CQ/Pt under visible light irradiation.

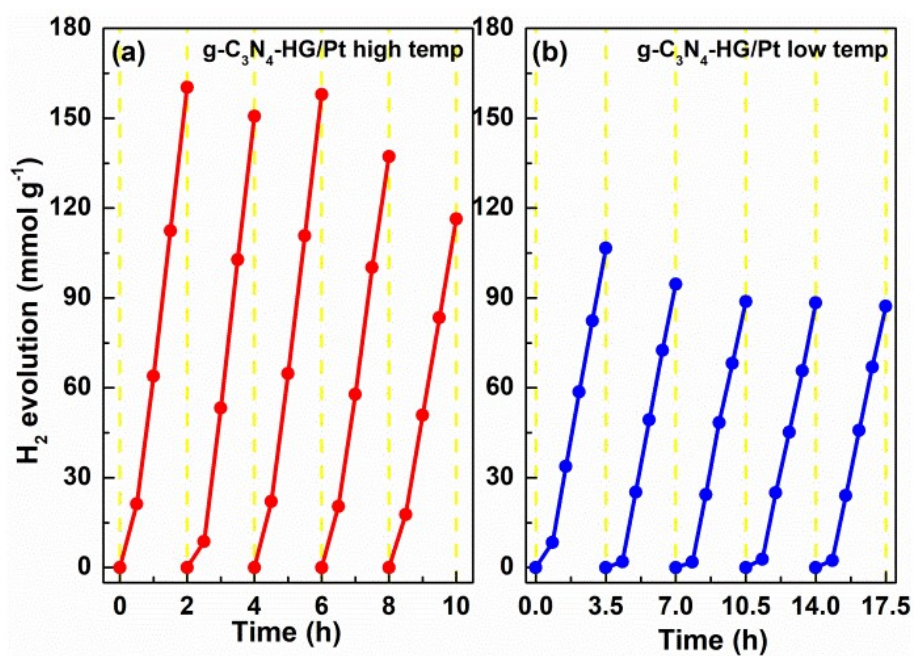

**Fig. S21** Successive test runs for the HER on g-C<sub>3</sub>N<sub>4</sub>-HG/Pt under visible light irradiation.

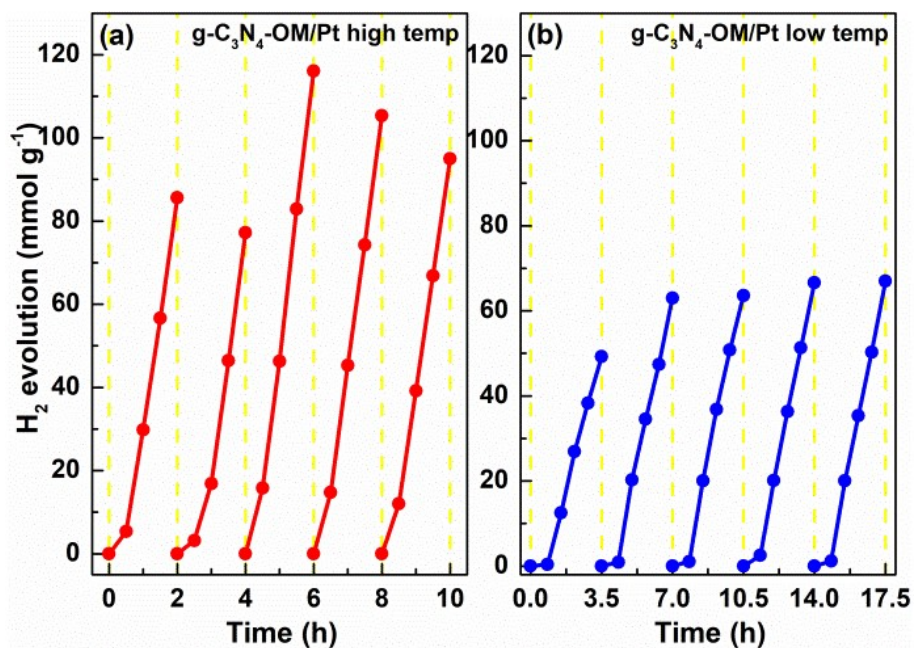

**Fig. S22** Successive test runs for the HER on g-C<sub>3</sub>N<sub>4</sub>-OM /Pt under visible light irradiation.

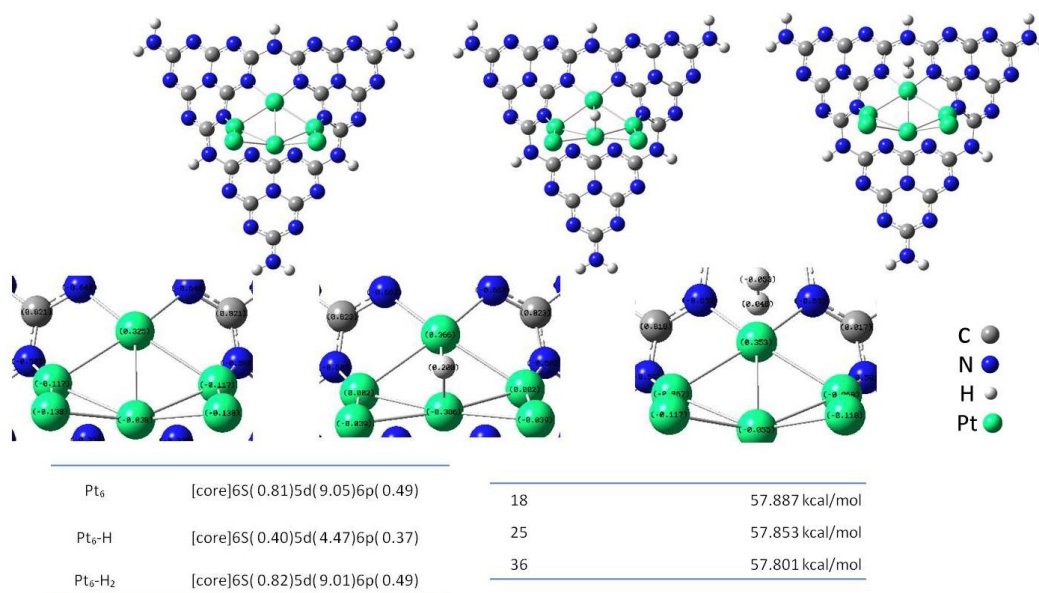

**Fig. S23** NBO charges analysis for the calculated Pt<sub>6</sub>-CN, H-Pt<sub>6</sub>-CN and H<sub>2</sub>-Pt<sub>6</sub>-CN.

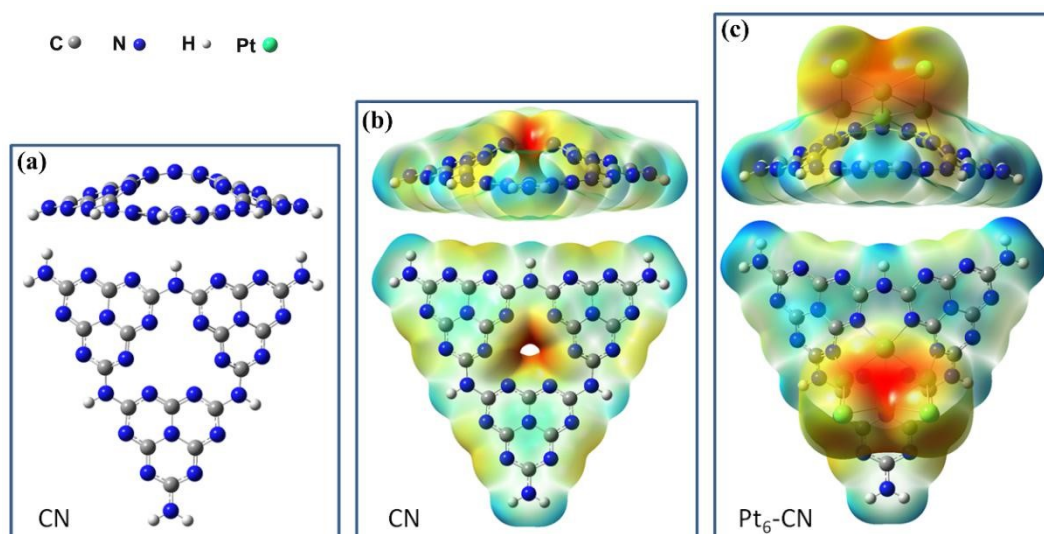

**Fig. S24** (a) Schematic chemical structure of g-C<sub>3</sub>N<sub>4</sub>. (b) Surface electrostatic potential distribution of g-C<sub>3</sub>N<sub>4</sub>. (c) Surface electrostatic potential distribution of Pt cluster-carbon nitride (Pt<sub>6</sub>-CN). Upper, side view. Below, vertical view

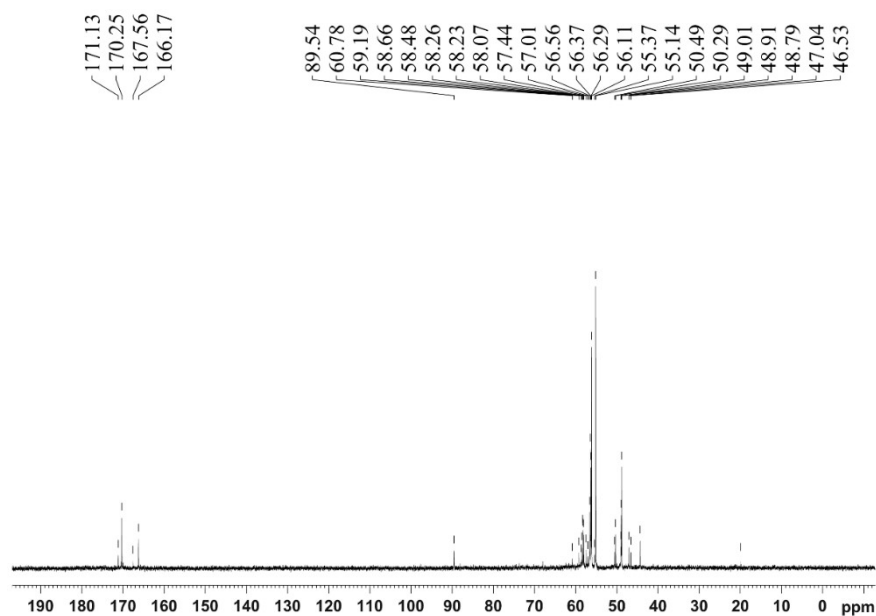

**Fig. S25** The nuclear magnetic resonance (NMR) spectrum for TEOA polymerization product.



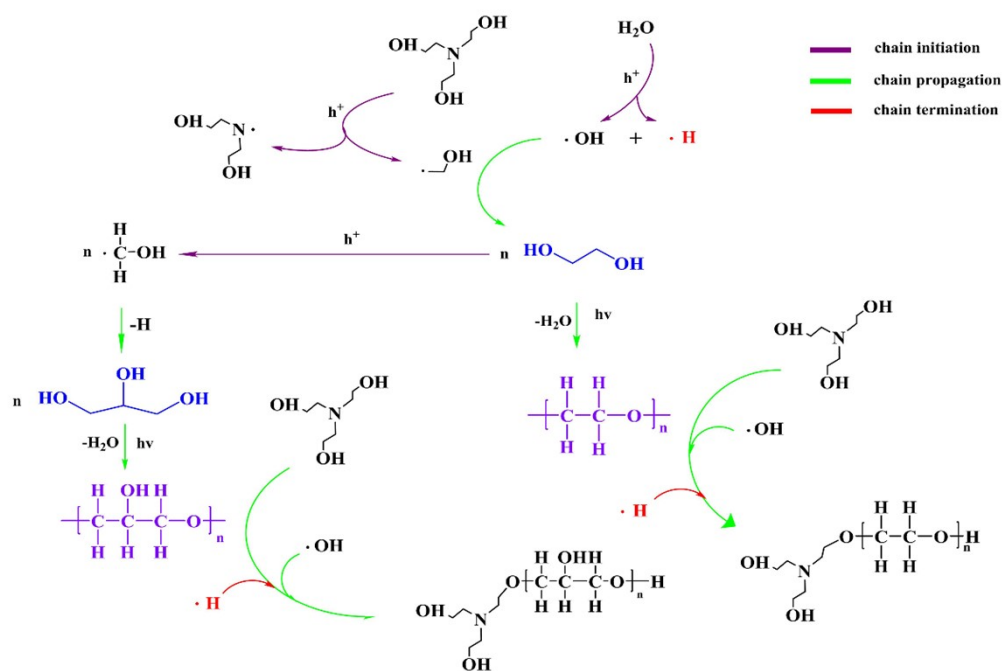

**Fig. S26** Scheme for free radical polymerization of TEOA initiated by STAP hole-mediated radical reactions.

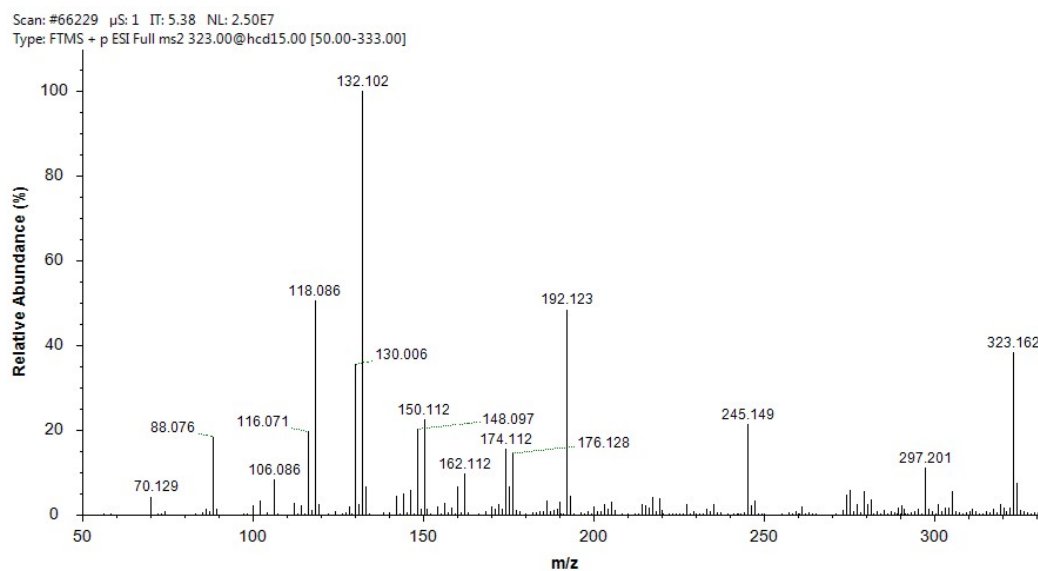

**Fig. S27** The mass spectrum (part) of TEOA polymerization product.

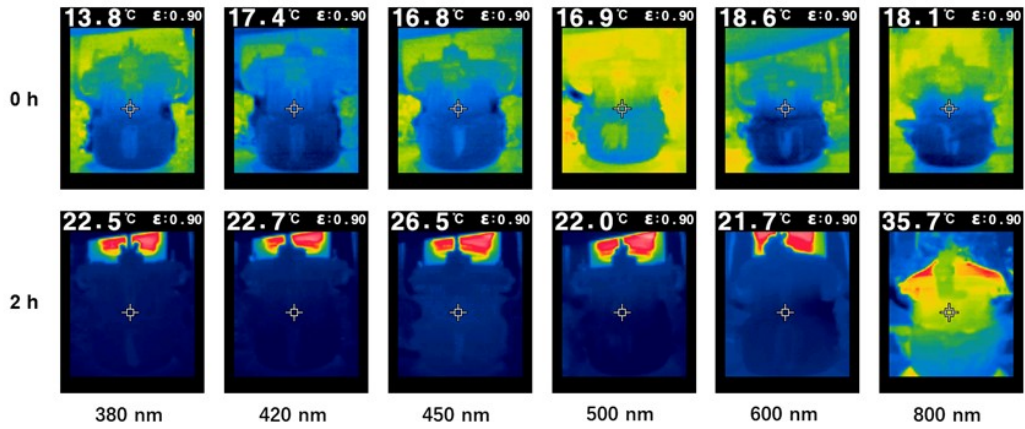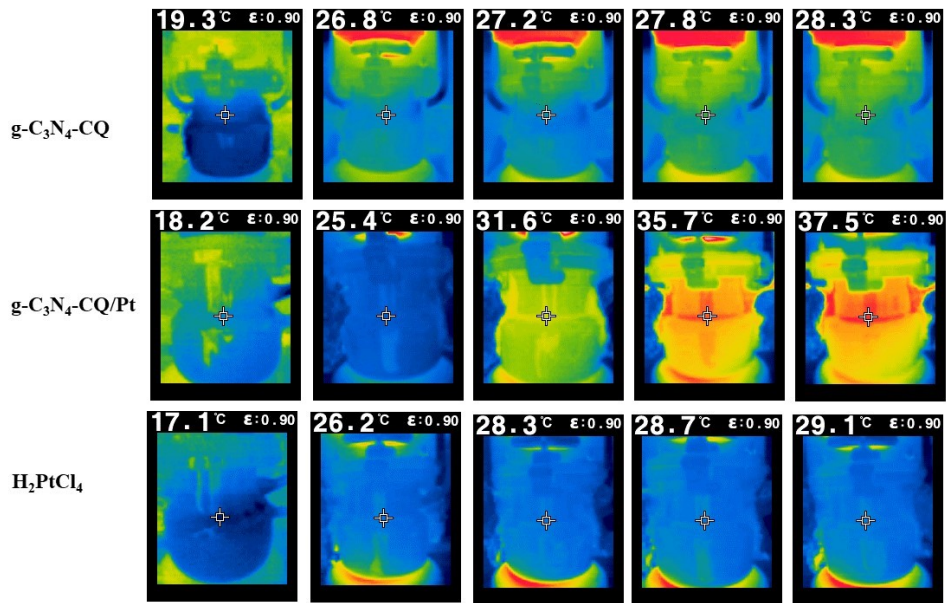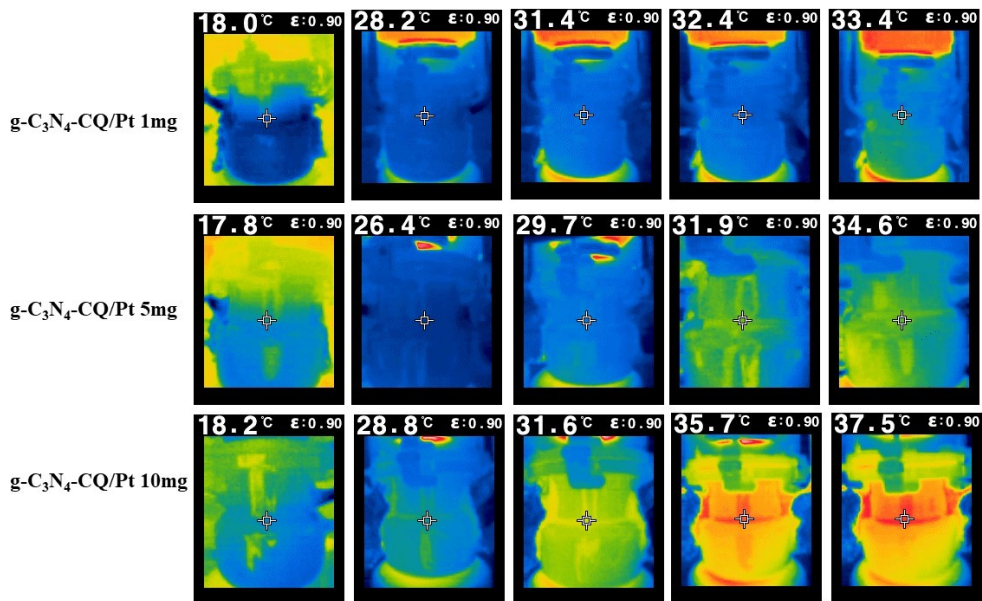

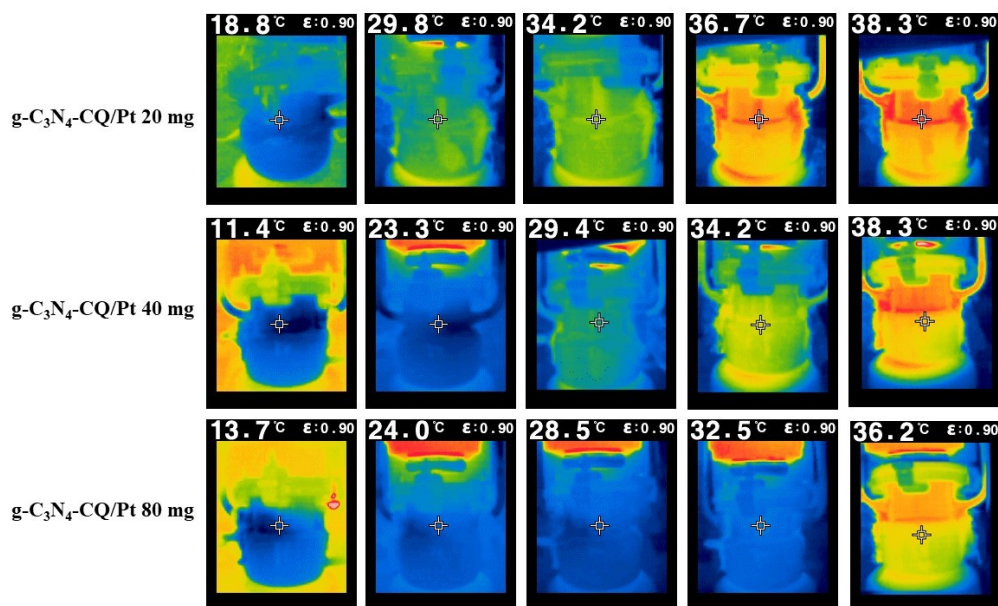

**Fig. S28** Infrared camera images of solution temperature change under irradiation.

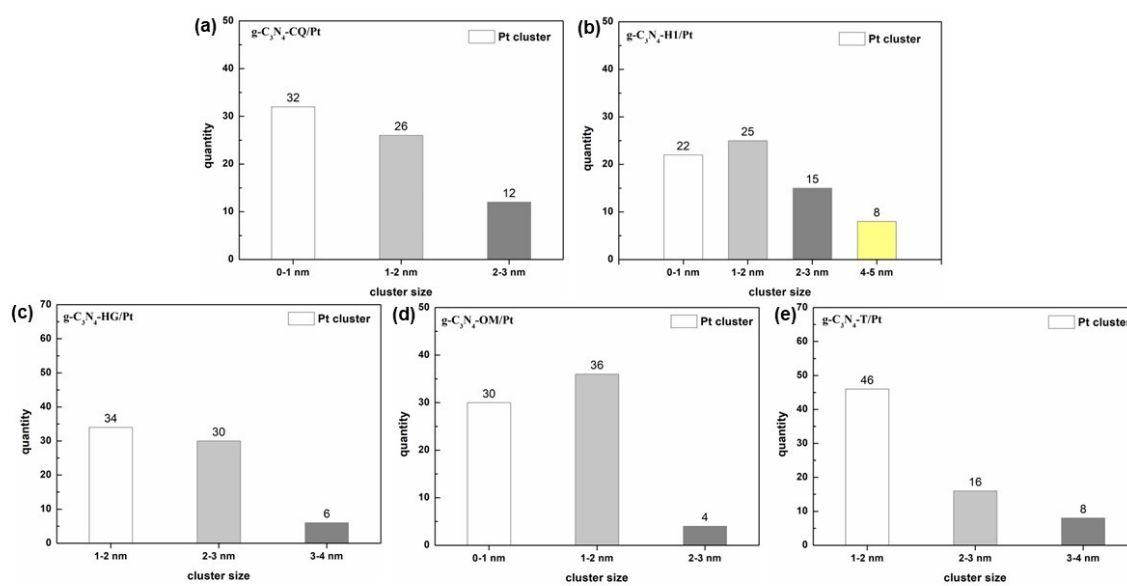

**Fig. S29** The particle size of (a) g-C<sub>3</sub>N<sub>4</sub>-CQ/Pt, (b) g-C<sub>3</sub>N<sub>4</sub>-HI/Pt, (c) g-C<sub>3</sub>N<sub>4</sub>-HG/Pt, (d) g-C<sub>3</sub>N<sub>4</sub>-OM/Pt, (e) g-C<sub>3</sub>N<sub>4</sub>-T/Pt.

**Table S1.** Atomic percentage and atomic ratio for TEOA polymerization production

| Weight (mg) | N (%) | C (%) | H (%) | S (%) | C/N ratio | C/H ratio | Atomic ratio                                           |
|-------------|-------|-------|-------|-------|-----------|-----------|--------------------------------------------------------|
| 0.9030      | 3.79  | 42.77 | 6.058 | 0.781 | 11.2718   | 7.0607    | C <sub>13.2</sub> NH <sub>22.4</sub> O <sub>10.8</sub> |

**Table S2.** XPS atomic percentage analysis of Pt deposited g-C<sub>3</sub>N<sub>4</sub> samples

|                                        | C 1s<br>(Atomic %) | N 1s<br>(Atomic %) | O 1s<br>(Atomic %) | Pt 4f<br>(Atomic %) | Pt 4f<br>(wt%) |
|----------------------------------------|--------------------|--------------------|--------------------|---------------------|----------------|
| g-C <sub>3</sub> N <sub>4</sub> -CQ    | 52.45              | 41.00              | 6.55               |                     |                |
| g-C <sub>3</sub> N <sub>4</sub> -CQ/Pt | 50.67              | 44.35              | 4.75               | 0.23                | 0.0012         |
| g-C <sub>3</sub> N <sub>4</sub> -HG    | 51.40              | 42.84              | 5.76               |                     |                |
| g-C <sub>3</sub> N <sub>4</sub> -HG/Pt | 51.22              | 44.28              | 4.34               | 0.16                | 0.0008         |
| g-C <sub>3</sub> N <sub>4</sub> -OM    | 51.08              | 43.94              | 4.99               |                     |                |
| g-C <sub>3</sub> N <sub>4</sub> -OM/Pt | 51.13              | 43.53              | 5.06               | 0.28                | 0.0014         |
| g-C <sub>3</sub> N <sub>4</sub> -H1    | 47.94              | 46.75              | 5.31               |                     |                |

---

|                                        |       |       |      |      |        |
|----------------------------------------|-------|-------|------|------|--------|
| g-C <sub>3</sub> N <sub>4</sub> -H1/Pt | 45.53 | 51.01 | 3.27 | 0.18 | 0.0009 |
| g-C <sub>3</sub> N <sub>4</sub> -T     | 54.77 | 37.91 | 7.33 |      |        |
| g-C <sub>3</sub> N <sub>4</sub> -T/Pt  | 50.46 | 44.82 | 4.52 | 0.20 | 0.0010 |

---
